# Supplementary material for: Mechanism of DNA assembly as revealed by energy barriers
Source: Royal Society of Chemistry journal article supplement (doi:10.1039/c5cc00783f), 2015-01-01
Supplement: c5cc00783f1.pdf [file c5cc00783f1.pdf]

Supporting information:

## Mechanism of DNA Assembly as Revealed by Energy Barriers

Lin Niu<sup>1</sup>, Xuyan Yang<sup>1</sup>, Jihan Zhou<sup>1</sup>, Chengde Mao<sup>2\*</sup>, Haojun Liang<sup>3</sup>, Dehai Liang<sup>1\*</sup>

### Experimental Section

#### Materials.

The 52-base-long, single strand DNA tiles were purchased from Invitrogen Corporation (Shanghai, China) and used as received. Tris base (tris(hydroxymethyl)aminomethane) and EDTA (ethylenediamine tetraacetic acid) were purchased from Sigma-Aldrich Co., LTD. Acetic acid and magnesium acetate [Mg(Ac)<sub>2</sub>] were purchased from Beijing Chemical Reagent Company. TAE/Mg<sup>2+</sup> buffer consisting of Tris base (40 mM), acetic acid (20 mM), EDTA (2 mM), and Mg(Ac)<sub>2</sub> (12.5 mM) were prepared by Milli-Q water. DNA tiles at 3 μM in TAE/Mg<sup>2+</sup> was used for the assembly. DNA solution was filtered through a 0.45 μm PES filter (Sartorius stedim biotech corp., Germany) and collected in a dust-free sample vial before the measurement.

#### Laser Light Scattering Measurements.

Static light scattering (SLS) and dynamic light scattering (DLS) experiments are conducted on a commercialized spectrometer (Brookhaven Inc, Holtsville, NY) equipped with a BI-200SM Goniometer and a BI-TurboCorr Digital Correlator. A solid-state laser polarized at the vertical direction (GXL-III, 100mW, CNI, Changchun, China) operating at 633 nm was used as the light source. SLS measurements were carried out at scattering angles in the range of 20°-120°. The time averaged excess scattered intensity at angle  $\theta$ , also known as the Rayleigh ratio  $R_{v,}(\mathbf{q})$ , was related with the weight-averaged molar mass  $M_w$ , the Z-averaged root mean square radius  $R_g$ , the second virial coefficient  $A_2$ , and the scattering vector  $\mathbf{q}$  as,

$$\frac{KC}{R_{v,}(\mathbf{q})} \approx \frac{1}{M_w} \left( 1 + \frac{1}{3} R_g^2 q^2 \right) + 2A_2 C \quad (1)$$

where  $K = 4\pi^2 n^2 (dn/dC)^2 / (N_A \lambda_0^4)$  and  $q = (4\pi n / \lambda) \sin(\theta/2)$ , with  $N_A$ ,  $n$ ,  $(dn/dC)$  and  $\lambda_0$  being the Avagadro constant, the refractive index of the solvent, the specific refractive index increment of the solution, and the wavelength of light in vacuum, respectively.

For DLS, the intensity-intensity time autocorrelation function  $G^{(2)}(t)$  was measured in the self-beating mode. It is related to the normalized first order electric field time correlation function  $g^{(1)}(t)$  as

$$G^{(2)}(t) = \langle I(0)I(t) \rangle = A \left[ 1 + \beta |g^{(1)}(t)|^2 \right] \quad (2)$$

where  $A$  is the measured base line,  $\beta$  is a coherence factor,  $t$  is the delay time, and  $g^{(1)}(t)$  is the normalized first-order electric field time correlation function. The line width distribution  $G(\Gamma)$  was analyzed with a Laplace inversion program, CONTIN, based on the following relation,

$$g^{(1)}(t) = \int_0^\infty G(\Gamma) e^{-\Gamma t} d\Gamma \quad (3)$$

The average line width,  $\bar{\Gamma}$ , was calculated according to

$$\bar{\Gamma} = \int \Gamma G(\Gamma) d\Gamma \quad (4)$$

From the average line width  $\bar{\Gamma}$ , the average diffusion coefficient  $D$  can be calculated as  $D = \bar{\Gamma} / q^2$ , which was then converted into the hydrodynamic radius  $R_h$  by using the Stokes-Einstein equation:

$$R_h = k_B T / 6\pi\eta D \quad (5)$$

### Energy Calculation

The energy barrier is calculated from Arrhenius equation:

$$k = A e^{-E_a / RT} \quad (6)$$

with A,  $E_a$ , R, and T being the frequency factor, the apparent activation energy, the universal gas constant, and temperature, respectively. The reaction rate k is inversely proportional to the delay time  $\tau_0$ , then

$$\ln(1 / \tau_0) = \ln A - E_a / RT \quad (7)$$

The energy barrier  $E_a$  and the frequency factor A of the nucleation process can be calculated from the slope and the intercept, respectively. According to transition state theory<sup>2</sup>,

$$E_a = RT + \Delta_r^+ H_m^\theta \quad (8)$$

with  $\Delta_r^+ H_m^\theta$  being the standard molar enthalpy of activation.

The frequency factor A has a positive relationship with  $\Delta_r^+ S_m^\theta$ , the standard molar entropy of activation,

$$A = \frac{k_B T}{h} e^n (c^\theta)^{1-n} \exp\left[\frac{\Delta_r^+ S_m^\theta (c^\theta)}{R}\right] \quad (9)$$

with  $k_B$ ,  $h$  being Boltzmann constant and Planck constant, respectively.

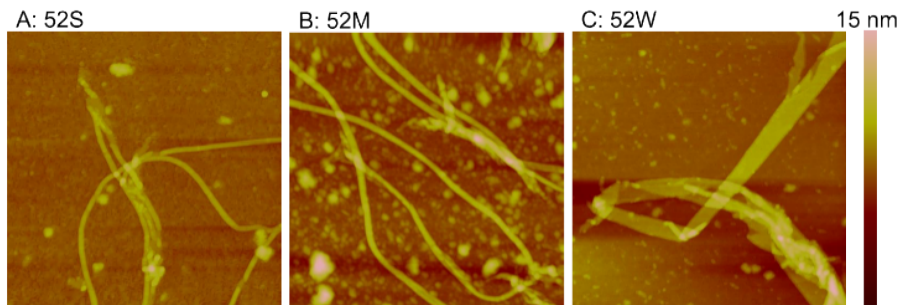

**Figure S1.** Atomic force microscope (AFM) images of the assembled DNA crystalline structures. The DNA samples (1.0  $\mu\text{M}$ ) are annealed from 95  $^\circ\text{C}$  to room temperature. The length of each frame is 3  $\mu\text{m}$ .

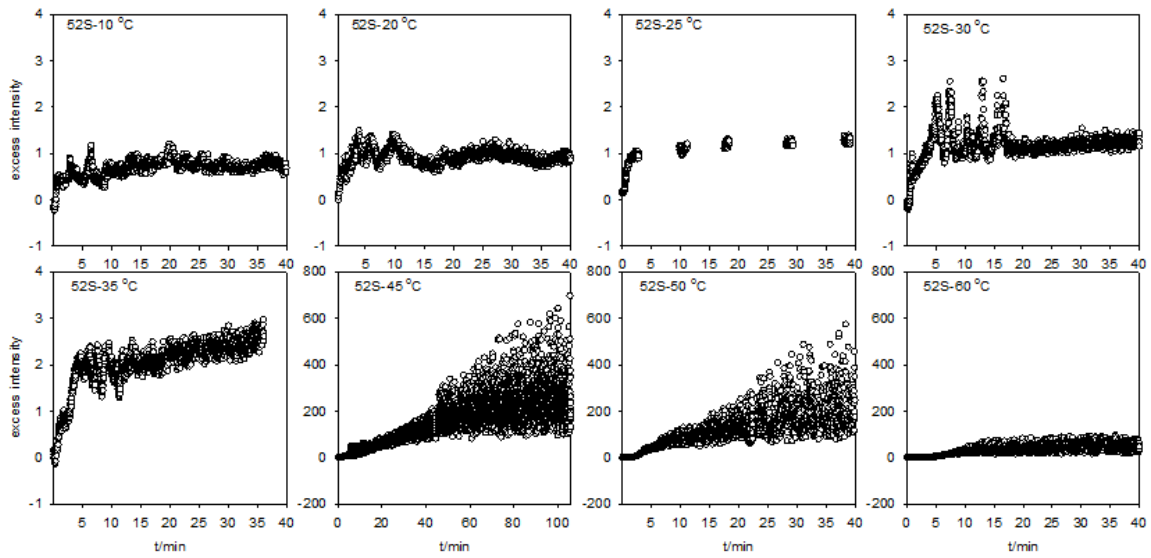

**Figure S2.** Excess scattered intensity curves of 52S at 30 ° at constant temperatures.

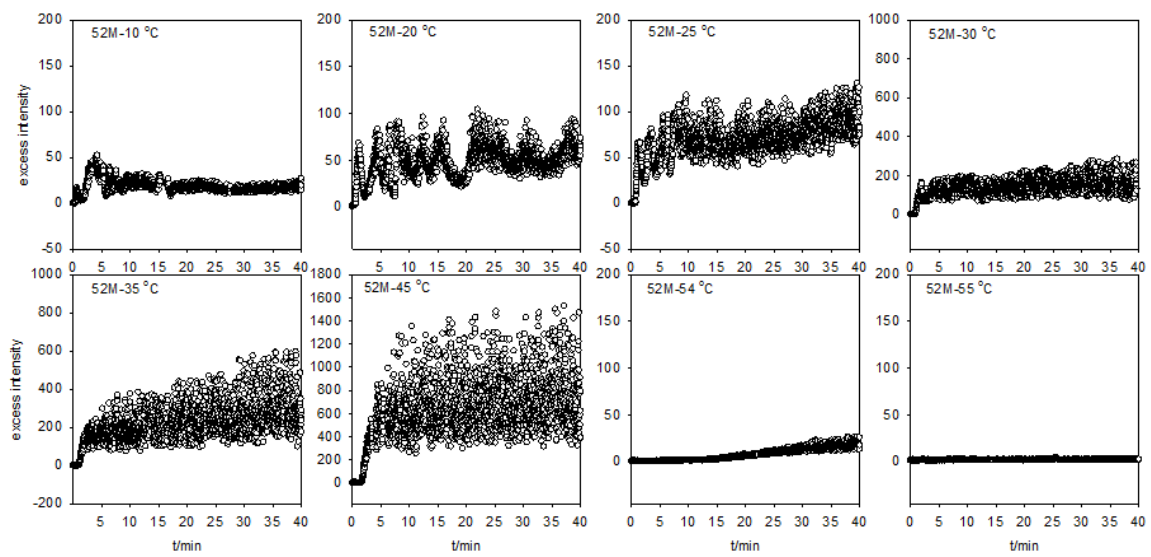

**Figure S3.** Excess scattered intensity curves of 52M at 30 ° at constant temperatures.

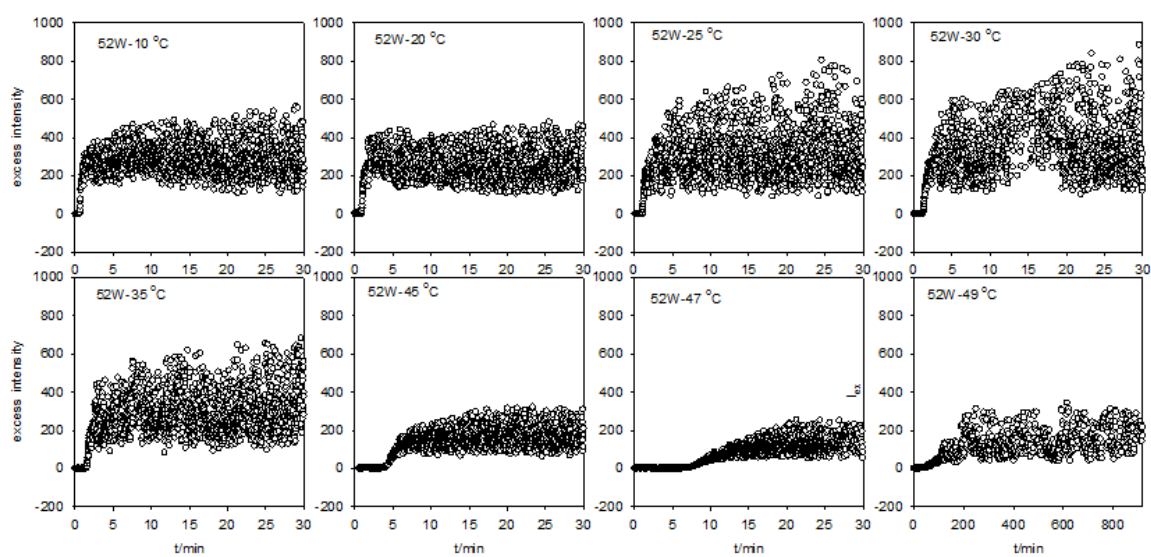

**Figure S4.** Excess scattered intensity curves of 52W at 30 ° at constant temperatures.

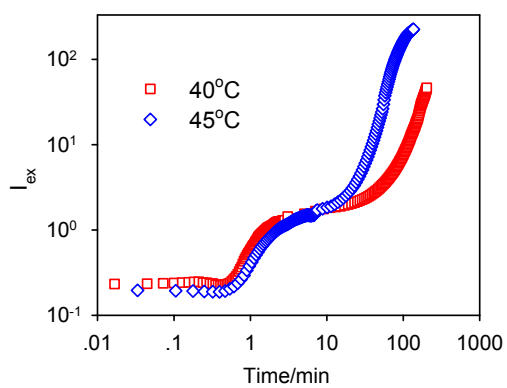

**Figure S5:** Smoothed scattered intensity of 52S at 2 uM at 40 °C and 45 °C.

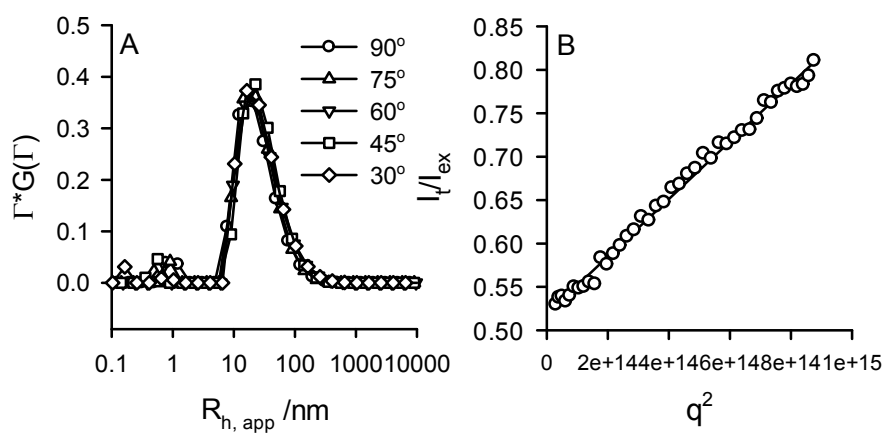

**Figure S6.**  $R_h$  distribution (A) and the angular dependence of the excess scattered intensity (B) of 52S at 25 °C after incubated for 1 hour.

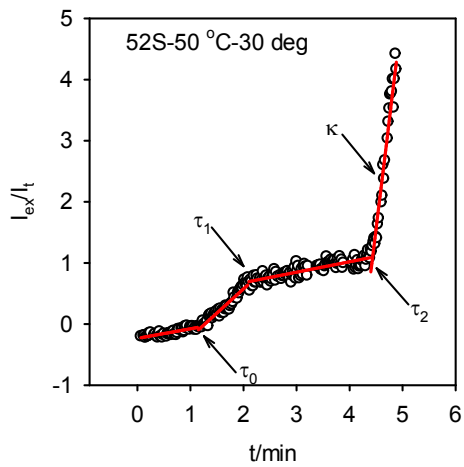

**Figure S7.** Definition of the parameters used to calculate energy barrier. (52S at 50 °C as an example).

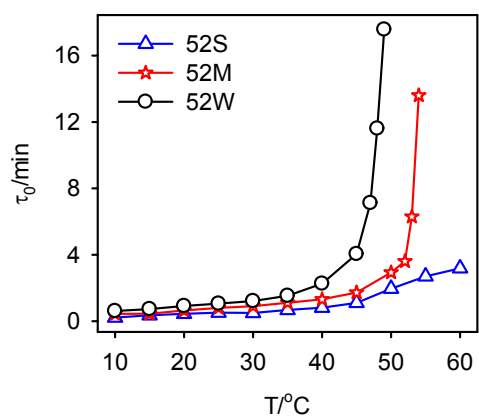

**Figure S8.** Temperature dependence of  $\tau_0$  for the DNA tiles.

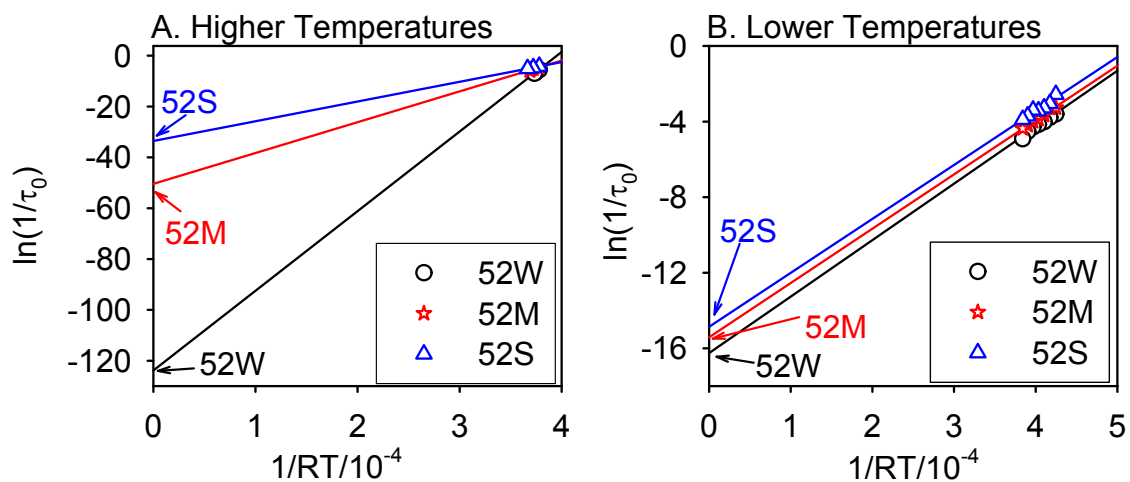

**Figure S9.** Extrapolated curve to calculate assembly entropy based on transition state theory and Arrhenius equation at higher temperature (A), and lower temperature (B).

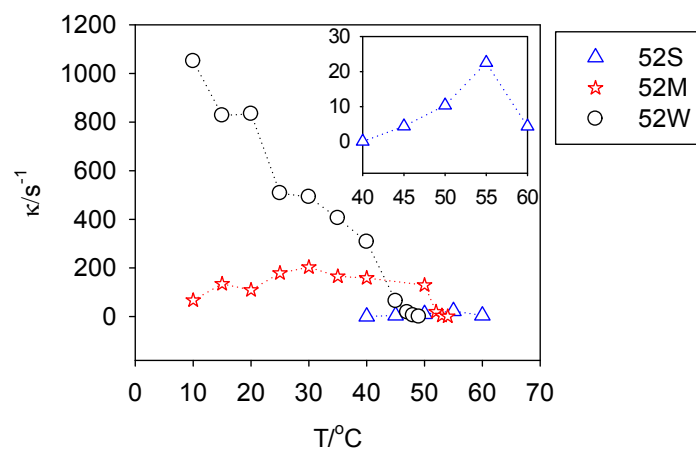

**Figure S10.** Temperature dependence of the growth rate  $\kappa$  for the three DNA tiles.

- 
1. J. Zhang, D. Li, G. Liu, K. J. Glover and T. B. Liu, *J. Am. Chem. Soc.*, 2009, **131**, 15152-15159.
  2. D. G. Truhlar, B. C. Garrett and S. J. Klippenstein, *J. Phys. Chem.*, 1996, **100**, 12771-12800.
